# Supplementary material for: COVID-19 Causes Ferroptosis and Oxidative Stress in Human Endothelial Cells
Source: Antioxidants (Basel). 2023 Jan 31;12(2):326. doi: 10.3390/antiox12020326 (PMC9952002; doi:10.3390/antiox12020326)
Supplement: Supplementary file 1 [file antioxidants-12-00326-s001.zip › antioxidants-2102478-supplementary.pdf]

## **COVID-19 causes ferroptosis and oxidative stress in human endothelial cells**

Stanislovas S. Jankauskas, Urna Kansakar, Celestino Sardu, Fahimeh Varzideh, Roberta Avvisato, Xujun Wang, Alessandro Matarese, Raffaele Marfella, Marcello Ziosi, Jessica Gambardella, and Gaetano Santulli

|                                                                | Survivors | Non-Survivors |
|----------------------------------------------------------------|-----------|---------------|
| <b>Number of patients</b>                                      | 22        | 20            |
| <b>Age (years)</b>                                             | 62±8.4    | 63±14         |
| <b>Sex: Male/Female (%)</b>                                    | 74/26     | 72/28         |
| <b>Time to death after admission and blood sampling (days)</b> | n/a       | 17.4±16.7     |

**Table S1.** Main characteristics of COVID-19 patients from whom the serum was obtained. Data are mean ± SD or percentage. \*: p<0.01.

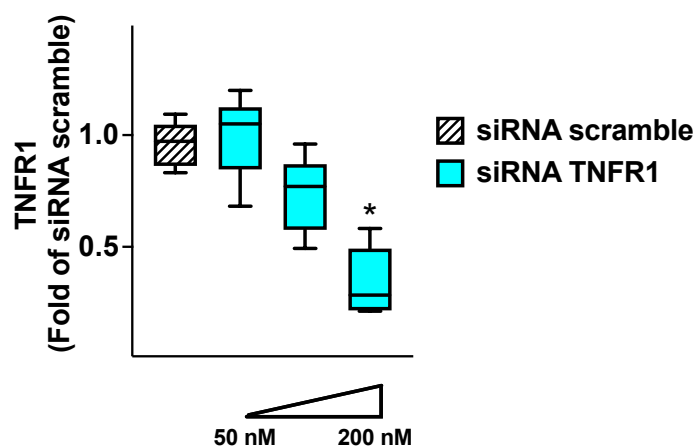

**Figure S1**

Successful knock-down of TNFR1 in human endothelial cells. HUVECs were treated for 48 h with siRNA scramble or siRNA TNFR1 to test TNFR1 silencing in dose-response assays (data were normalized for the housekeeping gene GAPDH; \*:p<0.01 *vs* siRNA scramble). Three different doses of TNFR1 siRNA were tested: 50, 100, and 200 nM. The experiments were performed at least in triplicate; the box-and-whiskers graph shows the median and the 5<sup>th</sup>-95<sup>th</sup> percentiles. Sequences of oligonucleotide primers are listed in Table 1.
